# Supplementary material for: The Role of Micronutrients in Human Papillomavirus Infection, Cervical Dysplasia, and Neoplasm
Source: MDPI journal article supplement (doi:10.3390/healthcare11111652), 2023-06-05
Supplement: s1 [file s1]

**Table S1:** summary of relevant studies on calcium

| Author, year   | Country | Design                | Sample size, groups                                                                                                                                                                                                                         | Rational                                                                       | Main findings                                                                                                                                                                                                                                                                                                                                                                                                                                               |
|----------------|---------|-----------------------|---------------------------------------------------------------------------------------------------------------------------------------------------------------------------------------------------------------------------------------------|--------------------------------------------------------------------------------|-------------------------------------------------------------------------------------------------------------------------------------------------------------------------------------------------------------------------------------------------------------------------------------------------------------------------------------------------------------------------------------------------------------------------------------------------------------|
| He, 2020       | China   | Cross sectional study | - 13475 participants from NHANES<br>- evaluation of dietary calcium                                                                                                                                                                         | Association between dietary calcium and HPV infection status and HPV sub-type  | - Calcium intake was not independently associated with HPV infection status or HPV sub-type.<br>- After converting dietary calcium intakes with the log <sub>2</sub> function, a saturated effect was found: at the range of 3.32–9.78 of log <sub>2</sub> calcium intake, a unit increase in calcium intake was associated with a 17% decrease of risk of HPV infection. After this range, no further decrease in risk of HPV infection could be observed. |
| Hwang, 2010    | Korea   | Cross sectional study | 328 HPV-positive patients:<br>- Group 1: 166 HPV positive women without evidence of CIN<br>- Group 2: 90 CIN 1 + 72 CIN 2-3                                                                                                                 | Effects of dietary supplements on HR-HPV infection and cervical carcinogenesis | Dietary supplement including calcium significantly associated with a lower risk of CIN 2-3 (OR, 0.21; 95% CI, 0.08-0.50).                                                                                                                                                                                                                                                                                                                                   |
| Liu, 1993      | USA     | Case-control study    | - Group 1: 257 women with cervical dysplasia (cases)<br>- Group 2: 133 women negative at cytologic and colposcopic evaluation (controls)<br>24h dietary recall questionnaire to assess nutritional intake                                   | Association between dietary intake and cervical dysplasia                      | No association between calcium intake and cervical dysplasia, with a multivariate-adjusted OR for the highest to lowest level of intake of 0.9 (95% CI 0.4–2.1)                                                                                                                                                                                                                                                                                             |
| Sengupta, 1989 | India   | Cross sectional study | - Group 1 (n 14): cervical carcinoma and pre-menopausal state<br>- Group 2 (n 14): cervical carcinoma and post-menopausal state<br>- Group 3 (n 14): healthy and pre-menopausal state<br>-Group 4 (n 14): healthy and post-menopausal state | Levels of serum calcium and cervical cancer state                              | Levels of serum calcium significantly higher in cervical cancer patients compared to controls:<br>- group 3 vs group 1: 10.44 mg/dL vs 14.41 mg/dL (p<0.01)<br>- group 4 vs group 2: 10.97 mg/dL vs 17.46 (p <0.01)                                                                                                                                                                                                                                         |

HPV: human papilloma virus; OR: odds ratio; CI: interval of confidence; NHANES: National Health and Nutrition Examination Survey; CIN: cervical intraepithelial neoplasia

**Table S2:** summary of relevant studies on zinc

| Author, year     | Country  | Design                | Sample size, groups                                                                                                                                                                                    | Rational                                                                                | Main findings                                                                                                                                                                                                                                                                                           |
|------------------|----------|-----------------------|--------------------------------------------------------------------------------------------------------------------------------------------------------------------------------------------------------|-----------------------------------------------------------------------------------------|---------------------------------------------------------------------------------------------------------------------------------------------------------------------------------------------------------------------------------------------------------------------------------------------------------|
| Ayatollahi, 2022 | Iran     | RCT                   | - Group 1: 40, HPV test pos, LSIL<br>- Group 2: 40, controls (no treatment)<br>- Intervention: 220 mg zinc/12h for 3mo vs no treatment                                                                 | Persistence of HPV infection and progression from baseline cytology                     | Group 1: persistence infection (OR = 0.130) (CI 95% 0.04-0.381; p <0.001) and progression 0.301 (95% CI 0.777-0.116; p =0.012                                                                                                                                                                           |
| Xiao, 2022       | China    | Cross sectional study | - 4628 women from the NHANES<br>- Semi-quantitative food frequency questionnaire                                                                                                                       | Dietary intake of Zn and risk of HrHPV infection                                        | Highest with vs lowest quartiles of Zn intake:OR f0.72 (95% CI, 0.54–0.98) for hrHPV infection.                                                                                                                                                                                                         |
| Barchitta, 2020  | Italy    | Cross sectional study | - 251 women with normal citology<br>- Semi-quantitative food frequency questionnaire                                                                                                                   | Dietary intake of Zn and risk of HrHPV infection                                        | Higher zinc intake have lower odds of infection with HR-HPVs (OR = 0.46; 95% CI = 0.27–0.80; p-value = 0.006)                                                                                                                                                                                           |
| Kim, 2011        | Korea    | Comparative study     | - Group 1: 76, HPV test pos, LSIL<br>- Group 2: 118, controls (no treatment)<br>- Intervention: preparation of zinc citrate solution (0.5 mM) was administered topically 2/we for 3 mo vs no treatment | Impact of intravaginal zinc on persistency rate of HPV and cervical cytology regression | -Higher rates of HPV clearance in Gropup 1 (64.47%) vs Group 2 (25.51%) (p-value <0.001<br>-Reduced risk of persistent HPV in Group 1 (OR 0.079 (95% CI 0.039–0.165, -value<0.001).<br>- After 12 we, LISL lesions, 44.6% in Group 1 normalized cytologyvs21.4% of controls in Group 2 (p-value= 0.182) |
| Naidu,2007       | India    | Case control study    | - 120 cases of CC vs 30 controls                                                                                                                                                                       | Serum zinc level and risk of CC                                                         | Serum zincdecreased in cases compared to controls (p<0.001)                                                                                                                                                                                                                                             |
| Cunzhi, 2002     | Cina     | Case control study    | - 40 cases of CC vs 50 controls                                                                                                                                                                        | Relationship between serum trace elements and the incidence of cervical cancer          | -Serum zinc is lower in cases compared to controls (p<0.001)<br>- In cervical tissue zinc is lower than normal tissue (p<0.001)                                                                                                                                                                         |
| Chen, 1990       | Taiwan   | Case control study    | 99 cases of CC vs 50 controls                                                                                                                                                                          | Serum zinc level variation in CC                                                        | Zinc level decreased in stage III or IV and recurrent patients (67.2 +/- 16.6 and 70.4 +/- 17.2 micrograms/dl)                                                                                                                                                                                          |
| Grail, 1986      | Scotland | Case control study    | 110 CIN vs 9 cc vs 21 controls                                                                                                                                                                         | Serum zinc level in CIN, CC and controls                                                | Mean serum zinc levels decreased in LSIL (0.81 mg/l) and in invasive carcinoma (0.73 mg/l) compare to controls (p<0.005)                                                                                                                                                                                |

RCT: randomized controlled trial; HPV: human papilloma virus; HrHPV: high risk human papilloma virus; LSIL: low squamous intraepithelial lesion; OR: odds ratio; CI: interval of confidence; NHANES: National Health and Nutrition Examination Survey; we: week; mo:months; CC: cervical cancer.

**Table S3:** summary of relevant studies on iron

| Author, year | Country | Design             | Sample size, groups                                                                                                                                               | Rational                                                                                                           | Main findings                                                                                                                                                                                                                                                                                                                                                                                                                                                                                                                                                                                                                                                                                                                                                                             |
|--------------|---------|--------------------|-------------------------------------------------------------------------------------------------------------------------------------------------------------------|--------------------------------------------------------------------------------------------------------------------|-------------------------------------------------------------------------------------------------------------------------------------------------------------------------------------------------------------------------------------------------------------------------------------------------------------------------------------------------------------------------------------------------------------------------------------------------------------------------------------------------------------------------------------------------------------------------------------------------------------------------------------------------------------------------------------------------------------------------------------------------------------------------------------------|
| Siegel, 2012 | USA     | Cohort study       | 327 women enrolled in the Ludwig-McGill Cohort study                                                                                                              | Ferritin serum level and the Incident HPV clearance rates (any-type, oncogenic HPV, non-oncogenic HPV, and HPV-16) | <ul style="list-style-type: none"> <li>- Median duration of HPV infections did not significantly differ by iron status (adjusted HR 0.88, 95%CI 0.72, 1.07).</li> <li>- Ferritin levels above the median were less likely to clear an incident oncogenic HPV (adjusted HR=0.73; 95%CI 0.55–0.96) and HPV-16 infections (adjusted HR=0.29; 95%CI 0.11–0.73).</li> <li>- Women with enriched iron stores (ferritin <math>\geq 120\mu\text{g/L}</math>) were less likely to clear incident oncogenic HPV infections compared to those with low-levels of iron (<math>&lt;20\mu\text{g/L}</math>) (adjusted HR=0.34; 95%CI 0.15–0.81)</li> <li>- No significant association between ferritin at adequate or enriched levels and clearance of incident non-oncogenic HPV infections</li> </ul> |
| Cunzhi, 2003 | China   | Case control study | <ul style="list-style-type: none"> <li>- 40 cases of patients with cervical cancer</li> <li>- 30 cases of uterine myoma</li> <li>- 50 healthy subjects</li> </ul> | Tissue and serum levels of iron                                                                                    | <ul style="list-style-type: none"> <li>- Iron concentration in cervical cancer tissue was significantly higher than in non-lesion tissue (<math>p&lt;0.005</math>)</li> <li>- Iron serum concentration significantly lower in patients with cervical cancer compared to healthy subjects (<math>p&lt;0.001</math>)</li> </ul>                                                                                                                                                                                                                                                                                                                                                                                                                                                             |
| Ito, 1980    | Japan   | Case control study | 98 patients withuntreated cervical cancer<br>52 healthy controls                                                                                                  | Serum ferritin levels and prognosis of cervical cancer                                                             | <ul style="list-style-type: none"> <li>- In 98 patients with untreated cervical cancer, 50 (51%) had elevated levels of serum ferritin.</li> <li>- Among 36 patients who were surgically treated, 12 of 16 patients (75%) with ferritin levels above normal and 3 of 20 patients (15%) with levels below 108 ng/ml had parametrial invasion and/or lymph node metastasis.</li> <li>- Among 21 patients with elevated levels of ferritin before treatment, levels decreased to the normal range 4 weeks after treatment in many patients, but the development of elevated levels thereafter was closely associated with a poor prognosis.</li> </ul>                                                                                                                                       |

HPV: human papilloma virus; OR: odds ratio; aOR: adjusted odds ratio; HR: hazard ratio; CI: interval of confidence; CIN: cervical intraepithelial neoplasia; SILs: squamous intraepithelial lesions

**Table S4:** summary of relevant studies on selenium

| Author, year    | Country | Design                | Sample size, groups                                                                                                                                       | Rational                                                          | Main findings                                                                                                                                                                                                                                                                                                                                                                                                                                                                                                                       |
|-----------------|---------|-----------------------|-----------------------------------------------------------------------------------------------------------------------------------------------------------|-------------------------------------------------------------------|-------------------------------------------------------------------------------------------------------------------------------------------------------------------------------------------------------------------------------------------------------------------------------------------------------------------------------------------------------------------------------------------------------------------------------------------------------------------------------------------------------------------------------------|
| Xiao, 2022      | China   | Cross sectional study | 4628 women from the NAHNES<br>Se intakes were assessed from two 24-h diet recalls                                                                         | Relationship between selenium dietary amounts and hrHPV infection | No significant association between intakes of selenium and hrHPV infection in multivariate analysis                                                                                                                                                                                                                                                                                                                                                                                                                                 |
| Obhielo, 2019   | Nigeria | Case control study    | - 45 women with CIN (cases)<br>- 45 women (age matched controls) with normal cervical cytology                                                            | Relationship between serum level of selenium and CIN              | - Mean serum selenium level in cases was $52.32 \pm 20.46 \mu\text{g/L}$ vs $59.49 \pm 17.20 \mu\text{g/L}$ in the control group. This difference was not statistically significant.<br>- A statistically significant difference in the mean value of serum selenium observed between the controls and histological subgroups within the cases (CIN I, CIN II, and CIN III) using the ANOVA test ( $p = 0.021$ ).<br>- A statistically significant difference between controls (with normal cervix) and CIN 3 ( $p$ value = 0.016). |
| Karamali, 2015  | Iran    | RCT                   | 58 women with CIN1 randomly assigned to:<br>-Group 1 (n 28): 200 mg of Se (form: Se yeast) per day for 6 months<br>- Group 2 (n 28): placebo for 6 months | effects of long-term Se administration on the regression of CIN1  | A greater percentage of women in the Se group had regressed CIN1 (88.0 v. 56.0 %; $P = 0.01$ ) compared with those in the placebo group                                                                                                                                                                                                                                                                                                                                                                                             |
| Cunzhi, 2003    | China   | Case control study    | - 40 cases of patients with cervical cancer<br>- 30 cases of uterine myoma<br>- 50 healthy subjects                                                       | Tissue and serum levels of selenium                               | - Selenium concentration in cervical cancer tissue was significantly higher than in non-lesion tissue ( $p < 0.001$ )<br>- Selenium serum concentration significantly lower in patients with cervical cancer compared to healthy subjects ( $p < 0.001$ )                                                                                                                                                                                                                                                                           |
| Sundström, 1986 | Finland | Cross sectional study | - 25 cervical cancer patients<br>- 32 control women                                                                                                       | Serum selenium concentration                                      | Selenium plasma concentration in cervical cancer patients was significantly lower than in control subjects ( $0.97 \pm 0.06 \mu\text{mol/L}$ vs $1.26 \pm 0.03 \mu\text{mol/L}$ , $p < 0.001$ )                                                                                                                                                                                                                                                                                                                                     |

RCT: randomized controlled trial; HPV: human papilloma virus; hrHPV: high risk human papilloma virus infection; NHANES: National Health and Nutrition Examination Survey; OR: odds ratio; CI: interval of confidence; CIN: cervical intraepithelial neoplasia.

**Table S5:** summary of relevant studies on folate and vitamin B12

| Author, year      | Country | Design                | Sample size, groups                                                         | Rational                                                                                                                                   | Main findings                                                                                                                                                                                                                                                                                                                      |
|-------------------|---------|-----------------------|-----------------------------------------------------------------------------|--------------------------------------------------------------------------------------------------------------------------------------------|------------------------------------------------------------------------------------------------------------------------------------------------------------------------------------------------------------------------------------------------------------------------------------------------------------------------------------|
| Li, 2018          | China   | Case control study    | 80 normal cervix vs 55 CIN1 and 55 CIN2/3 and 64 CC                         | influences of folate on FHIT gene methylation and expression in the progression of cervical cancerization                                  | - The proliferation inhibition rate, apoptosis rate, and FHIT protein and mRNA expression levels increased with rising concentrations of folate<br>-Serum folate significantly decreased in CIN and CC groups (H=43.68, P<0.001)                                                                                                   |
| Sabihi, 2022      | Iran    | RCT                   | Group 1: 30 CIN2/3; 5mg/day folate x 12 we<br>Group 2: 30 controls, placebo | impact of folate supplementation on recurrence of CIN2/3                                                                                   | -non-significant decrease in recurrence of CIN2/3 in Group 1 in comparison with Group 2 (3.3% vs. 16.7%, p= 0.08)                                                                                                                                                                                                                  |
| Zhao, 2016        | China   | Cross sectional study | 20000 women; 247 LSIL, 125 HSIL and 877 controls                            | effect of folate status on CIN progression and relationship with hrHPV                                                                     | - Increased CIN correlated with higher rates of hrHPV infection and lower levels of serum folate<br>-HSIL had a significantly lower folate status than those with LSIL and normal cervical histology (p=0.02)                                                                                                                      |
| Piyathilake, 2014 | India   | Cross sectional study | 315 HPV 16 positive women diagnosed with either CIN 2 or ≤ CIN 1.           | association of plasma concentrations of folate and vitamin B12 on the degree of HPV 16m                                                    | - higher plasma folate and higher HPV 16m or higher plasma vitamin B12 and higher HPV 16m were 75% (P<0.01) and 60% (P=0.02) less likely to be diagnosed with CIN 2<br>- With a tertile increase in the plasma folate or vitamin B12, there was a 50% (p=0.03) and 40% (p=0.07) increase in the odds of a higher degree of HPV 16m |
| Piyathilake, 2010 | India   | Cross sectional study | 724 women screened for HPV                                                  | associations between serum concentrations of folate and vitamin B12 and hrHPV infections                                                   | - higher concentrations of serum folate (6 ng/mL) and vitamin B12 (356 pg/mL) were at lower risk of being positive for hrHPVs compared to those with serum folate lower than 6 ng/mL and serum vitamin B12 356pg/mL (odds ratio = 0.26; 95% confidence interval: 0.08–0.89; p= 0.03)                                               |
| Bai, 2014         | China   | Cross sectional study | 109 normal cervix, 101 CIN, 101 CC                                          | interactions by examining serum folate and DNA methylation of tumor suppressor gene FHIT and HPV 16 in women with normal cervix, CIN or CC | -ORs only with FHIT methylation (OR=11.47) or only with HPV 16 positive (OR=4.63) or with serum folate level lower than 3.19ng/ml (OR=1.68) in CC group were all higher than the control status of HPV 16 negative and FHIT unmethylation and serum folate level more than 3.19ng/ml (OR=1)                                        |
| Raghasuda, 2012   | India   | Case control study    | 136 control subjects vs 92 LSIL and 94 invasive CC                          | Association of serum folate and vit B12 with LSIL and C                                                                                    | -The risk estimates observed for B12 became prominent only when there was a deficiency in serum folate levels [LSIL OR:14.9 (95% CI: 2.65 to 84.4); CC–OR = 8.72 (95% CI = 1.55 to 48.8)] or when MTHFR A1298C polymorphic variant was present [LSIL OR = 9.8 (95% CI = 2.61 to 36.7); CC–OR = 10.0 (95%CI = 2.5 to 39.3)]         |
| Abike, 2010       | Turkey  | case control study    | - 122 women screened for HPV                                                | Association of serum folate and vit B12 with HPV infection persistence and CIN                                                             | -all cervical dysplasia groups, folate levels were lower in HPV-positive patients than in HPV-negative patients (P<0.05)                                                                                                                                                                                                           |

|                 |       |                    |                                                                   |                                                                                                      |                                                                                                                                        |
|-----------------|-------|--------------------|-------------------------------------------------------------------|------------------------------------------------------------------------------------------------------|----------------------------------------------------------------------------------------------------------------------------------------|
| Asemi, 2015     | Iran  | RCT                | Group 1: 29 CIN1 5 mg/d folate x 6 mo<br>Group 2: 29 CIN1 placebo | Effects of long-term folate supplementation on regression and metabolic status of patients with CIN1 | A greater percentage of women in Group 1 regressed compared to Group 2(83.3 versus 52.0%,p= 0.019)                                     |
| Wang, 2006      | China | case control study | 111 CC vs 111 controls                                            | effects of dietary intake of folate on cervical carcinogenesis and HPV16 infection                   | serum folate in CC cases (1.79 ng/ml +/- 1.42 ng/ml) was significantly lower than that in controls(2.59 ng/ml +/- 2.81 ng/ml) (p<0.05) |
| Hernandez, 2003 | USA   | case control study | -214 LSIL/HSIL vs 217 controls                                    | Association of dietary intake and CIN                                                                | inverse association between total folate intake and premalignant cervical lesions, especially for HSIL (p=0.04)                        |

---

RCT: randomized controlled trial; Yo: years old; CC: cervical cancer; CIN: cervical intraepithelial neoplasia; CI: confidence interval; OR: odds ratio; RR: relative risk; hrHPV: high risk human papilloma virus; We: week; HPV 16m: HPV 16 methylation; MTHFR: methylenetetrahydrofolate reductase; LSIL: low grade squamous intraepithelial; HSIL: high grade squamous intraepithelial

**Table S6:** summary of relevant studies on carotenoids

| Author, year   | Country | Design             | Sample size, groups                                                                                                                                               | Rational                                                                                                                  | Main findings                                                                                                                                                                                                                                                                                                                                                                                                                                                             |
|----------------|---------|--------------------|-------------------------------------------------------------------------------------------------------------------------------------------------------------------|---------------------------------------------------------------------------------------------------------------------------|---------------------------------------------------------------------------------------------------------------------------------------------------------------------------------------------------------------------------------------------------------------------------------------------------------------------------------------------------------------------------------------------------------------------------------------------------------------------------|
| Kanetsky, 2015 | USA     | Case control study | -32 women with cervical dysplasia (12 diagnosed with CIN 1, 10 with CIN 2, and 9 with CIN 3)<br>- 113 controls<br>Food frequency questionnaire and blood samples. | Dietary intake of carotenoids and risk of cervical dysplasia                                                              | Women in the upper tertile of lycopene intake were one-third (OR = 0.32, 95% CI = 0.8-1.3) and one-fourth (OR = 0.24, 95% CI = 0.05-1.2) as likely, respectively, to have dysplasia as women in the lower tertile. Elevated levels of serum lycopene also suggested some protection against dysplasia. Results were not significant at $\alpha = 0.05$                                                                                                                    |
| Fujii, 2012    | Japan   | Prospective study  | - 391 patients with CIN 1-2<br>- serum micronutrient concentrations and a questionnaire about dietary intake                                                      | serum concentrations and dietary intake of micronutrients and regression/progression of low-grade cervical abnormalities. | In non-smoking subjects, regression of CIN significantly associated with serum levels of zeaxanthin/lutein (HR 1.25, 95% CI 0.78–2.01, $p = 0.024$ ). In progression subjects, a significant protective effect against progression to CIN3 in individuals with a medium level of serum $\beta$ -carotene (HR 0.28, 95 % CI 0.11–0.71), although any protective effect from a higher level of serum $\beta$ -carotene was weaker or abolished (HR 0.52, 95 % CI 0.24–1.13) |
| Peterson, 2010 | USA     | Prospective study  | -120 women: persistent oncogenic HPV infection<br>- 141 women: persistent non oncogenic HPV infection                                                             | Association between dietary and serum levels of micronutrients and persistence of HPV infection                           | - No significant association between serum carotenoid levels and persistent infection with any type HPV.<br>-A greater than twofold increased risk of persistent infection with any type HPV was observed among women with low carotenoid status using dietary intake nutrients ( $p = 0.03$ ).                                                                                                                                                                           |
| Tomita, 2011   | Brazil  | Case control study | -231 confirmed cases of CIN3<br>- 453 controls<br>Food frequency questionnaires and serum levels                                                                  | Association between smoke, dietary and serum levels of micronutrients and CIN 3                                           | Low serum levels of lycopene resulted in an increased risk of developing CIN3 (OR 1.88, 95% CI 1.14-3.08).                                                                                                                                                                                                                                                                                                                                                                |
| Goodman, 2007  | USA     | Cohort study       | -189 incident oncogenic HPV infections among 122 women                                                                                                            | Association between carotenoid concentrations with the clearance of incident cervical HPV infection                       | Higher circulating levels of lutein/zeaxanthin, cryptoxanthin, lycopene, carotenes and total carotenoids associated with a significant decrease in the clearance time of HPV infection, particularly during the early stages of infection (< 120 days)                                                                                                                                                                                                                    |
| Giuliano, 2003 | USA     | Case control study | -433 women: 248 transient HPV infections and 185 had persistent HPV infections<br>food frequency questionnaire                                                    | association between dietary intake and persistence of HPV infection                                                       | Risk of persistent HPV infection was lower among women reporting intake values of $\beta$ -cryptoxanthin and lutein/zeaxanthin in the upper 2 quartiles compared with those reporting intake in the lowest quartile                                                                                                                                                                                                                                                       |
| Sedjo, 2003    | USA     | Prospective study  | 84 women with at least 1 oncogenic HPV infection at baseline                                                                                                      | Plasma levels of carotenoids and clearance of HPV infection                                                               | The likelihood of clearing an oncogenic HPV infection was significantly higher with increasing levels of trans-lycopene ( $p$ for trend, 0.025) and cis-lycopene ( $p$ for trend, 0.010). The aOR of the highest tertiles of trans- and cis-lycopene was 2.79 (95% CI 1/4 1.17–6.66) and 2.92 (95% CI 1/4 1.28–6.63) compared with the lowest tertiles.                                                                                                                   |
| Sedjo, 2002    |         | Prospective study  | 1042 women                                                                                                                                                        | role of carotenoids on HPV                                                                                                | A 56% reduction in HPV persistence risk was observed in                                                                                                                                                                                                                                                                                                                                                                                                                   |

|                  |             |                    |                                                                                                                                                                     |                                                                                         |                                                                                                                                                                                                                                                                                                                                                                                                                                            |
|------------------|-------------|--------------------|---------------------------------------------------------------------------------------------------------------------------------------------------------------------|-----------------------------------------------------------------------------------------|--------------------------------------------------------------------------------------------------------------------------------------------------------------------------------------------------------------------------------------------------------------------------------------------------------------------------------------------------------------------------------------------------------------------------------------------|
|                  |             |                    | food frequency questionnaire + plasma level of micronutrients                                                                                                       | persistence and regression                                                              | women with the highest plasma cis-lycopene concentrations compared with women with the lowest plasma levels (aOR 0.44; 95% CI, 0.19–1.01).                                                                                                                                                                                                                                                                                                 |
| Schiff, 2001     | USA         | Case control study | -81 cases: biopsyproven CIN 2 e CIN 3<br>- 160 controls                                                                                                             | Association between serum carotenoids and CIN                                           | Increasing levels of alpha-carotene, β-cryptoxanthin, and lutein/zeaxanthin were associated with decreasing risk of CIN 2-3. The highest tertiles of β-cryptoxanthin (OR 0.39, 95% CI 0.17–0.91) and lutein/zeaxanthin (OR 0.40, 95% CI 0.17–0.95) were associated with the lowest risk of CIN                                                                                                                                             |
| Nagata, 1999     | Japan       | Case control study | -152 women with cervical dysplasia<br>- 152 controls with normal cervical cytology                                                                                  | Plasma levels of micronutrients and risk of cervical dysplasia                          | Significantly lower serum levels of α-carotene, β-carotene and lycopene were observed in cases.                                                                                                                                                                                                                                                                                                                                            |
| Palan, 1996      | USA         | Case control study | - 140 women with CIN or cervical cancer<br>-95 controls                                                                                                             | Plasma carotenoids levels and cervical cancer/dysplasia                                 | The mean plasma levels of carotenoids were significantly lower in women with CIN and cervical cancer                                                                                                                                                                                                                                                                                                                                       |
| Romney, 1996     | USA         | RCT                | 69 omen:<br>- cases: daily oral supplementation of 30 mg of βcarotene for 9 months<br>- controls: placebo for 9 months                                              | evaluate the efficacy of β-carotene to cause regression of CIN.                         | The β-carotene and placebo groups did not differ in risk for having CIN at 9 months (OR = 1.53, CI 0.38–6.18)                                                                                                                                                                                                                                                                                                                              |
| Batieha, 1993    | USA         | Case control study | - 50 cases of cervical cancer<br>-100 controls                                                                                                                      | Relationship between serum micronutrients and risk of cervical cancer.                  | The mean serum levels of total carotenoids, alpha-carotene, β-carotene, cryptoxanthin, and lycopene were lower among cases than controls. When examined by tertiles, the risk of cervical cancer was significantly higher among women in the lower tertiles of total carotenoids (OR 2.7; 95% CI, 1.1-6.4), alpha-carotene (OR 3.1; 95% CI, 1.3-7.6), and β-carotene (OR 3.1; 95% CI, 1.2-8.1) as compared to women in the upper tertiles. |
| De Vet, 1991     | Netherlands | Case control study | - 257 caseswith cervical dysplasia who took 10 mg supplement of β-carotene/die<br>- 705 controls<br>- food frequency questionnaire                                  | effects of the dietary intake of β-carotene on cervical dysplasia.                      | Increased risk of cervical dysplasia for women with a high intake of β-carotene (> 3.5 mg/die vs < 1.5 mg/die): OR 2.31; 95% CI:1.27-4.19.                                                                                                                                                                                                                                                                                                 |
| De Vet, 1991     | Netherlands | RCT                | 137 cases with cervical dysplasia<br>Treated with 10mg of β-carotene daily for 3 months<br>- 141 controls with cervical dysplasia treated with placebo for 3 months | Effect of β-carotene of regression/progression of cervical dysplasia                    | No effect of β-carotene on the regression percentages was observed. A secondary analysis, in which the effect of the total intake of β-carotene (diet + medication) on the regression percentages of cervical dysplasia was studied, did not show a positive effect either                                                                                                                                                                 |
| Potischman, 1991 | USA         | Case control study | - 387 cases of invasive cervical cancer<br>- 670 controls                                                                                                           | Association between serum levels of micronutrients and risk of invasive cervical cancer | No association between serum level of lutein and invasive cervical cancer                                                                                                                                                                                                                                                                                                                                                                  |
| VanEenwyk, 1991  | USA         | Case control study | -102 cases with biopsy confirmed CIN 1, 2 or 3<br>- 102 controls                                                                                                    | Association between CIN and serum and dietary carotenoids                               | OR for those in quartiles 3,2,1 compared to quartile 4 (highest) of serum lycopene were 3.5 (95% CI 1.1-11.5), 4.7 (95% CI 1.2-17.7) and 3.8 (95% CI 1.1-12.4), respectively.<br>aORfor higher vs lowest quartile of dietary lycopene were: 4.6 (1.1-19.7), 5.8 (1.6-21.3) and 5.4 (1.3-23.3).                                                                                                                                             |



|              |    |                    |                                                                                     |                                                                     |                                                                                                                                                    |
|--------------|----|--------------------|-------------------------------------------------------------------------------------|---------------------------------------------------------------------|----------------------------------------------------------------------------------------------------------------------------------------------------|
| Harris, 1986 | UK | Case control study | -113 women with cervical cancer (32 invasive and 81 pre-invasive)<br>- 226 controls | Association between levels of $\beta$ -carotene and cervical cancer | mean $\beta$ -carotene levels were significantly reduced in women with pre-invasive disease compared with controls (221.3 vs 291.6ug/L, $p<0.05$ ) |
|--------------|----|--------------------|-------------------------------------------------------------------------------------|---------------------------------------------------------------------|----------------------------------------------------------------------------------------------------------------------------------------------------|

RCT: randomized controlled trial; HPV: human papilloma virus; HR: hazard ratio; OR: odds ratio;aOR adjusted odds ratio; CI: interval of confidence; CIN: cervical intraepithelial neoplasia.

**Table S7:** summary of relevant studies on vitamin A

| Author, year    | Country | Design                | Sample size, groups                                                              | Rational                                                                                                  | Main findings                                                                                                                                                                                                                                                                                         |
|-----------------|---------|-----------------------|----------------------------------------------------------------------------------|-----------------------------------------------------------------------------------------------------------|-------------------------------------------------------------------------------------------------------------------------------------------------------------------------------------------------------------------------------------------------------------------------------------------------------|
| Huang, 2020     | China   | Cross sectional study | 13412 women with available HPV test                                              | Relation between vit.A intake and HPV infection                                                           | - curvilinear relationship between vit A and HPV infection (U-shaped curve)<br>- appropriate amount (95% CI: 0.9–1.0, <10.5 of log2 transformer, i.e., 1448.155 mcg) of dietary vit A beneficial to prevent HPV infection.                                                                            |
| Eleuterio, 2014 | Brasil  | Cross sectional study | 62 women with confirmed SIL diagnosis                                            | serum levels of vit A in women diagnosis SIL                                                              | The level of Vit A more frequently low in HSIL, but with no statistical significance (p = 0.409)( OR: 2.26 ;0.33–15.59)                                                                                                                                                                               |
| Ghosh, 2008     | USA     | Case control study    | 239 CC vs 979 controls                                                           | evaluation of different intakes of selected dietary nutrients and food groups and risk of cervical cancer | women in the highest vs. lowest tertiles of dietary reduced risk of cervical cancer with higher intakes of vit. A (OR = 0.47, 95% CI = 0.30–0.73)                                                                                                                                                     |
| Kim, 2010       | Korea   | Case control study    | 144 CC vs 288 controls                                                           | Relation between vit.A intake and CC                                                                      | highest quartiles of dietary vitamin C intake had statistically significantly lower cervical cancer risks than those in the lowest quartiles for vitamin COR = 0.36 (CI = 0.18–0.69)                                                                                                                  |
| Yeo, 2000       | USA     | Case control study    | 326 controls vs 190 CIN1 and 112 CIN2/3                                          | Relation between serum level of vit.A intake and CIN                                                      | subjects in the lowest serum vit.A quartile were at increased risk of CIN I compared with women in the highest quartile (OR = 2.3, 95% CI = 1.3–4.1) (p=0.001)                                                                                                                                        |
| Shimizu, 1996   | Japan   | Case control study    | 137 cases with cervical dysplasia vs controls matched for age and screening date | Relation between serum and dietary Vit.A and the risk of cervical dysplasia                               | -Mean serum retinol levels were significantly lower among cases compared with controls (606.6 vs 640.6ng/mL. p 0.04)<br>- When examined by tertile, the risk of cervical dysplasia was significantly higher among women in the highest tertile of dietary vitamin A level (OR 2.45 95% CI 1.11-5.38). |

Yo: years old; CC: cervical cancer; CIN: cervical intraepithelial neoplasia; CI: confidence interval; OR: odds ratio; RR: relative risk; HPV: human papilloma virus.

**Table S8:** summary of relevant studies on vitamin C

| Author, year    | Country    | Design                | Sample size, groups                                                | Rational                                                                              | Main findings                                                                                                                                                                                      |
|-----------------|------------|-----------------------|--------------------------------------------------------------------|---------------------------------------------------------------------------------------|----------------------------------------------------------------------------------------------------------------------------------------------------------------------------------------------------|
| Zheng, 2022     | China      | Cross sectional study | 2174 women, 18–59 years of age                                     | associations between serum vitamin C levels and HPV infection                         | - serum vitamin C levels negatively associated with HPV infection in women ≥25 yo, not under 25<br>- negative correlation between adequate vitamin C and HPV infection (OR 0.7, 95% CI: 0.52–0.94) |
| Barchitta, 2020 | Italy      | Cross sectional study | 251 women with normal cervical citology                            | associations between serum vitamin C levels and Hr-HPV infection                      | Hr-HPV women reported lower intake of zinc compared to non-infected women (p<0.002)                                                                                                                |
| Ghosh, 2008     | USA        | Case control study    | 239 cases of CC vs 979 controls                                    | impact of vit. C dietary intake and risk of CC                                        | reduced risk for women in the highest vs. lowest tertiles of vit. C dietary intake (OR = 0.52, 95% CI =0.33–0.80)                                                                                  |
| Naidu, 2007     | India      | Case control study    | 120 CC vs 30 controls                                              | associations between serum vitamin C levels and CC                                    | decreased levels of plasma Vitamin-C (p<0.001) in all the stages of CC patients compared with controls                                                                                             |
| Giuliano, 2003  | USA        | Nested case study     | 248 transient HPV infection; 185 persistent HPV infection          | association between dietary intake and persistence of HPV infection                   | decreased persistence of type-specific HPV infection in a period of 12 months in the women with highest intake (adjusted odds ratio 0.50; CI 95% 0.27–0.92)                                        |
| Shannon, 2002   | Thailand   | Case control study    | -134 invasive CC vs 384 controls<br>-50 CC in situ vs 125 controls | evaluate the possible effects of specific dietary factors on cervical carcinogenesis. | higher intake of vitamin C reduce a risk of either in-situ or invasive cervical cancer                                                                                                             |
| VanEewyk, 1992  | USA        | Case control study    | 100 CIN vs 102 controls                                            | Association of vit. C dietary intake and CIN                                          | reduced risk for women in the highest vs lowest quartile for vitamin C intake: OR 0.20; 95% CI: 0.10 to 0.50; p< 0.005                                                                             |
| Herrero, 1992   | Costa Rica | Case control study    | 748 invasive CC vs 1411 controls                                   | Association between vit. C intake and risk of CC                                      | decreasing risk observed for adequate vitamin C (OR = 0.69 for the highest vs. the lowest quartile; p= 0.003)                                                                                      |
| Ziegler, 1991   | USA        | Case control study    | 229 case in situ CC vs 502 controls                                | Association between vit. C intake and risk of CC                                      | The highest risk among consumers in the Vit. C lowest quartile of intake (RR of 1.5)                                                                                                               |
| Brock, 1988     | Australia  | Case control study    | 117 CC in situ vs 196 controls                                     | Vit C dietary intake and risk of CC                                                   | High intake of vit C (>280 mg/day) seems to provide a substantial protective effect                                                                                                                |

Yo: years old; CC: cervical cancer; CIN: cervical intraepithelial neoplasia; CI: confidence interval; OR: odds ratio; RR: relative risk; HPV: human papilloma virus.

**Table S9:** summary of relevant studies on vitamin D

| Author, year          | Country | Design                | Sample size, groups                                                                                                                                                                                                                                                                                                                   | Rational                                                                                   | Main findings                                                                                                                                                                                                                                                                           |
|-----------------------|---------|-----------------------|---------------------------------------------------------------------------------------------------------------------------------------------------------------------------------------------------------------------------------------------------------------------------------------------------------------------------------------|--------------------------------------------------------------------------------------------|-----------------------------------------------------------------------------------------------------------------------------------------------------------------------------------------------------------------------------------------------------------------------------------------|
| Vahedpoor, 2018       | Iran    | RCT                   | 58 patients with CIN2-3 treated with LEEP randomly assigned to 2 groups:<br>- Group 1: 50,000 IU vitamin D3 (n:29) every 2 weeks for 6 months<br>- Group 2: placebo (n: 29) every 2 weeks for 6 months                                                                                                                                | Effects of vitamin D supplementation on the recurrence of CIN                              | The recurrence rate of CIN 1-2-3 was 18.5% and 48.1% in the vitamin D and placebo groups respectively (p = 0.02). After excluding CIN1 cases of recurrence, the recurrence rate of CIN2-3 became nonsignificant (3.7% in the vitamin D group vs. 14.8% in the placebo group, p = 0.15). |
| Vahedpoor, 2017       | Iran    | RCT                   | -58 women diagnosed with CIN I randomly assigned to 2 groups:<br>- Group 1: 50,000 IU vitamin D3 (n:29) every 2 weeks for 6 months<br>- Group 2: placebo (n: 29) every 2 weeks for 6 months                                                                                                                                           | Effects of long-term vitamin D administration on regression of CIN1                        | Greater percentage of women in the vitamin D group had regressed CIN1 (84.6 vs. 53.8%, p = 0.01) than those in the placebo group.                                                                                                                                                       |
| Özgü, 2015            | Turkey  | Case control study    | - 23 cases of HPV DNA positive women<br>- 62 controls                                                                                                                                                                                                                                                                                 | Serum level of 25-OH vitamin D3 and risk of HPV DNA positivity                             | -Mean of 25-OH Vitamin D3 levels of study and control groups were 8,0857 IU/ml and 11,4720 IU/ml respectively(p=0,009).                                                                                                                                                                 |
| Schulte-Uebbing, 2014 | Germany | Cross sectional study | -Group 1: 100 patients with chronic bacterial and/or fungal infection and no cervical dysplasia.<br>- Group 2: 100 patients with chronic bacterial and/or fungal infections and cervical dysplasia (50 with a CIN 1 and 50 with a CIN 2).<br>Intervention: vitamin D vaginal suppositories (12.500 IU, 3 nights a week, for 6 weeks). | Effects of vaginal vitamin D supplementation on cervical infections and cervical dysplasia | Group 1: 79% of the women had “less vaginal problems,” “less discharge” and “less problems with the sexual intercourse.”<br><br>Group 2: In the CIN 1 group, after six weeks of treatment, a goodantidysplastic effects was noted. No effect was evident on CIN 2.                      |
| Hosono, 2010          | Japan   | Case control study    | - 405 incident cervical neoplasia (333 invasive cervical carcinomas + 72 CIN 3)<br>- 2025 controls<br>Food frequency questionnaires                                                                                                                                                                                                   | Dietary intake of vitamin D and cervical neoplastic risk                                   | - No association between vitamin D intake among CIN3 was evident (P for trend = 0.109).<br>- An inverse association between Vitamin D intake and cervical neoplastic risk (lowest vs highest quartile of vitamin D intake OR 0.64, 95% CI 0.43–0.94)                                    |

RCT: randomized controlled trial; HPV: human papilloma virus; LEEP: Loop Electrosurgical Excision procedure; OR: odds ratio; CI: interval of confidence; CIN: cervical intraepithelial neoplasia.

**Table S10:** summary of relevant studies on vitamin E

| Author, year  | Country | Design                | Sample size, groups                                                                                                                                                                                                 | Rational                                                                            | Main findings                                                                                                                                                                                                                                                                                                                                                                                                                                   |
|---------------|---------|-----------------------|---------------------------------------------------------------------------------------------------------------------------------------------------------------------------------------------------------------------|-------------------------------------------------------------------------------------|-------------------------------------------------------------------------------------------------------------------------------------------------------------------------------------------------------------------------------------------------------------------------------------------------------------------------------------------------------------------------------------------------------------------------------------------------|
| Guo, 2015     | China   | Case control study    | - 458 cases of invasive cervical cancer<br>- 742 controls<br>- serum vitamin E levels                                                                                                                               | Serum levels and dietary intake of vitamin E levels and risk of cervical cancer     | The OR for the highest (vs. lowest) quartile of serum vitamin E was 0.53 (95% CI = 0.37–0.74; $P < 0.001$ ).                                                                                                                                                                                                                                                                                                                                    |
| Zhang, 2015   | China   | Case control study    | - 158 incident cases of cervical cancer<br>- 200 controls                                                                                                                                                           | Plasma levels of $\alpha$ - and $\gamma$ -tocopherols and risk of cervical cancer   | Inverse associations between $\alpha$ -tocopherol concentrations and the risk of cervical cancer after adjusting for potential confounders ( $p = 0.002$ ).                                                                                                                                                                                                                                                                                     |
| Tomita, 2010  | Brazil  | Case control study    | - 453 controls<br>- 4 groups of cases (CIN1: 140; CIN2: 126; CIN3: 231; invasive cancer: 108)                                                                                                                       | Serum and dietary intake of tocopherol and risk of CIN                              | Increasing serum concentrations of $\alpha$ - and $\gamma$ -tocopherols were inversely associated with CIN3 risk; the aOR for the highest compared to the lowest quartile of $\alpha$ -tocopherol was 0.36 (95%CI, 0.18–0.74) and for the highest versus lowest tertile of $\gamma$ -tocopherol was 0.51 (95%CI, 0.28–0.91) after adjusting for confounding variables.                                                                          |
| Ghosh, 2008   | USA     | Case control study    | - 239 cases diagnosed with squamous cell carcinoma of the cervix<br>- 979 patients with non neoplastic diagnosis<br>- self administered questionnaire                                                               | Association between dietary vitamin E intake and HPV infection status               | Significant reduction of risk observed in women in the highest vs lowest tertiles of vitamin E intake (OR = 0.44, 95% CI = 0.27–0.72)                                                                                                                                                                                                                                                                                                           |
| Siegel, 2006  | USA     | Cohort study          | - 405 HPV positive women: 229 oncogenic and 176 non-oncogenic infections                                                                                                                                            | Serum levels of tocopherol and HPV persistence                                      | Midlevels of $\alpha$ -tocopherol were inversely associated with nononcogenic HPV persistent infection (aOR 0.28, 95% CI 0.14–0.57), while high levels were marginally associated (aOR 0.59, 95% CI 0.28–1.19).<br>Circulating levels of $\alpha$ - and $\delta$ -tocopherol in the middle or upper tertiles inversely associated with non-oncogenic HPV persistence (aOR 0.44, 95% CI 0.19–0.97 and aOR 0.46, 95% CI 0.19–1.11, respectively). |
| Palan, 2004   | USA     | Cross sectional study | - study groups: 37 women with cervical intraepithelial neoplasia + 14 women with cervical cancer<br>- 21 controls                                                                                                   | Plasma levels of $\alpha$ -tocopherol and $\alpha$ -tocopheryl quinone              | Plasma levels of $\alpha$ -tocopherol and $\alpha$ -tocopheryl quinone were decreased significantly ( $P=0.012$ and $P=0.005$ , respectively) in study groups compared with the control group                                                                                                                                                                                                                                                   |
| Palan, 2003   | USA     | Cross sectional study | - 48 controls without any history of abnormal Pap smears<br>- patients with histopathologically confirmed diagnoses of CIN 1: 98 patients; CIN 2: 49 patients, CIN 3: 10 patients and cervical cancer: 25 patients. | mean plasma levels of $\alpha$ -tocopherol and $\gamma$ -tocopherol and risk of CIN | Mean plasma levels $\alpha$ - tocopherol and $\gamma$ -tocopherol were significantly lower ( $P < 0.001$ , and $P < 0.001$ , respectively) in patients with various grades of CIN and cervical cancer compared with controls.                                                                                                                                                                                                                   |
| Goodman, 1998 | USA     | Case control study    | - 147 cases of SILs and 191 controls<br>- plasma levels of $\alpha$ -tocopherol                                                                                                                                     | Plasma levels of $\alpha$ -tocopherol and risk of SILs                              | The OR among women in the highest compared with the lowest quartile was 0.3 (95% CI, 0.1-0.8) for $\alpha$ -tocopherol.                                                                                                                                                                                                                                                                                                                         |

HPV: human papilloma virus; OR: odds ratio; aOR: adjusted odds ratio; HR: hazard ratio; CI: interval of confidence; NHANES: National Health and Nutrition Examination Survey; CIN: cervical intraepithelial neoplasia; SILs: squamous intraepithelial lesions;

**Table S11:** summary of relevant studies on vitamin K

| Author, year | Country | Design                | Sample size, groups                                                                   | Rational                                                       | Main findings                                                                                                                                |
|--------------|---------|-----------------------|---------------------------------------------------------------------------------------|----------------------------------------------------------------|----------------------------------------------------------------------------------------------------------------------------------------------|
| Jiang, 2022  | China   | Cross sectional study | - 13447 participants from NHANES<br>- evaluation of dietary vitamin K intake          | Association between dietary vitamin K and HPV infection status | More than 14.03mcg of dietary vitamin K intake maybe reduce the risk of HPV-infection. HPV-subtype was not associated with vitamin K intake. |
| Wang, 2020   | China   | Cohort study          | - 218 randomly selected subjects<br>- semi-quantitative food frequency questionnaires | Association between dietary nutrient intake and CIN risk       | Low dietary vitamin K was associated with CIN2+ risk (second versus fourth quartile: OR = 1.60, 95% CI 1.05–2.44)                            |

HPV: human papilloma virus; OR: odds ratio; aOR: adjusted odds ratio; HR: hazard ratio; CI: interval of confidence; NHANES: National Health and Nutrition Examination Survey; CIN: cervical intraepithelial neoplasia; SILs: squamous intraepithelial lesions
